# Supplementary material for: A graphene-like MoS2/graphene nanocomposite as a highperformance anode for lithium ion batteries
Source: Royal Society of Chemistry journal article supplement (doi:10.1039/c4ta01644k), 2014-01-01
Supplement: c4ta01644k1.pdf [file c4ta01644k1.pdf]

Supporting Information for  
**Graphene-like MoS<sub>2</sub>/graphene Nanocomposite as High-performance Anode for Lithium Ion Batteries**

Yongchang Liu, Yanping Zhao, Lifang Jiao\* and Jun Chen

Key Laboratory of Advanced Energy Materials Chemistry (MOE), College of Chemistry,  
Collaborative Innovation Center of Chemical Science and Engineering, Nankai University,  
Tianjin 300071, P.R. China

**Supplementary Figures**

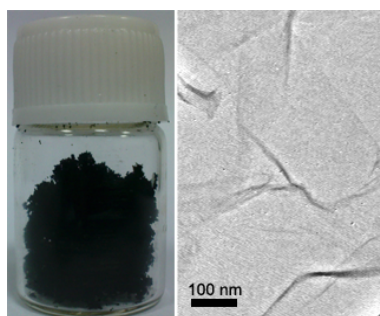

**Fig. S1** Macro and micro morphologies of as-synthesized graphene nanosheets (GNS).

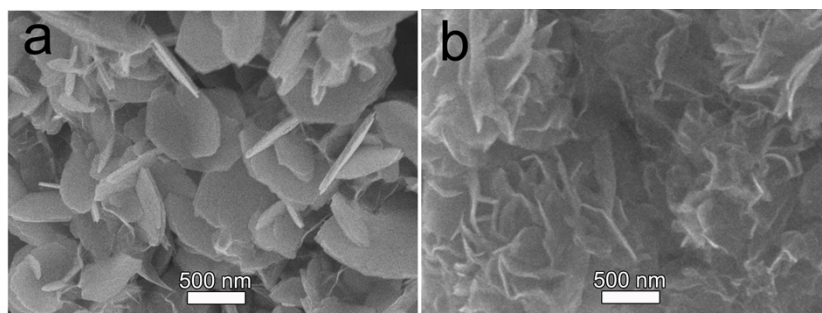

**Fig. S2** SEM images of (a) pure restacked MoS<sub>2</sub>, (b) MoS<sub>2</sub>/GNS-30 composite.

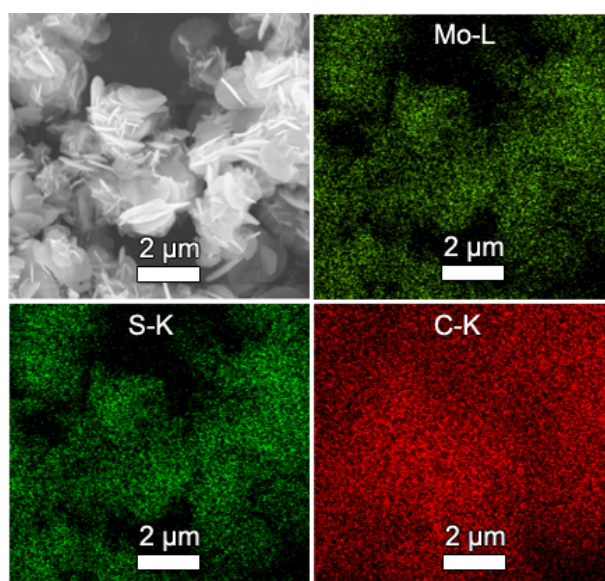

**Fig. S3** SEM EDX mapping image of MoS<sub>2</sub>/GNS-15 nanocomposite.

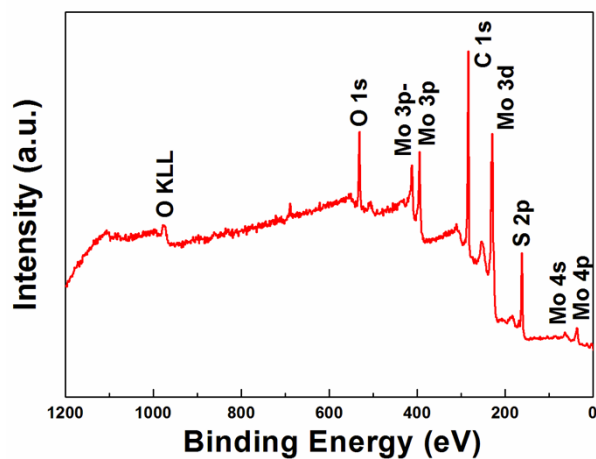

**Fig. S4** Survey XPS spectrum of MoS<sub>2</sub>/GNS-15 nanocomposite.

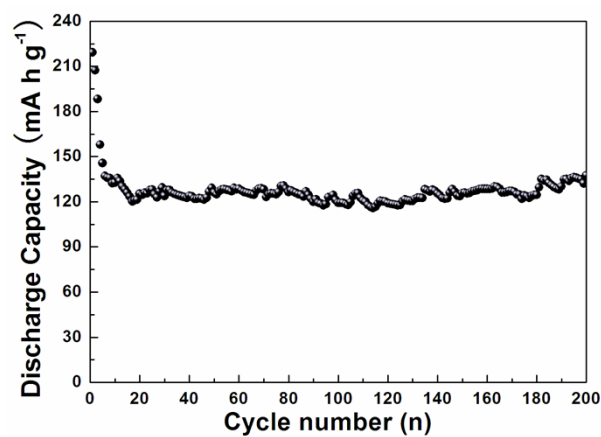

**Fig. S5** The cycling behavior of free GNS obtained by a thermal exfoliation process in lithium ion batteries (at a current density of 100 mA g<sup>-1</sup>).
